# Supplementary figures and images for: Composition of Mosquito Fauna and Insecticide Resistance Status of Anopheles gambiae complex in Itang special woreda, Gambella, Southwestern Ethiopia
Source: Research Square preprint supplement (doi:10.21203/rs.3.rs-739196/v1), 2021-07-29

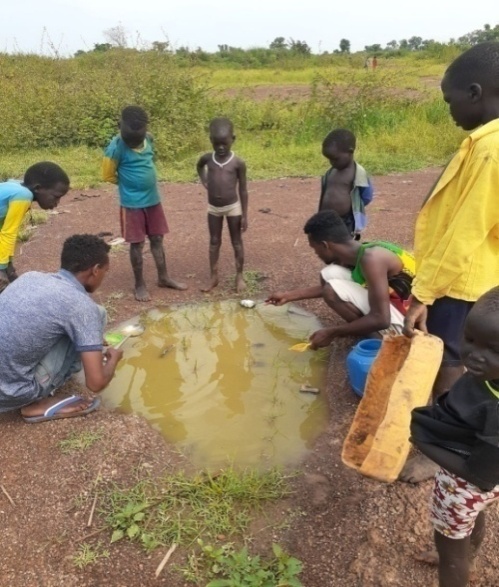

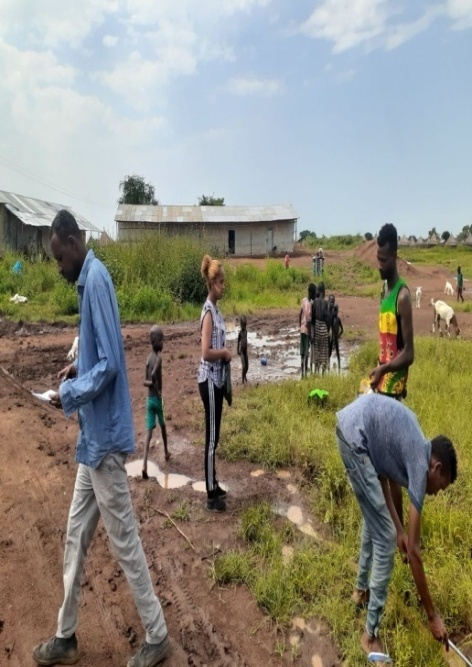


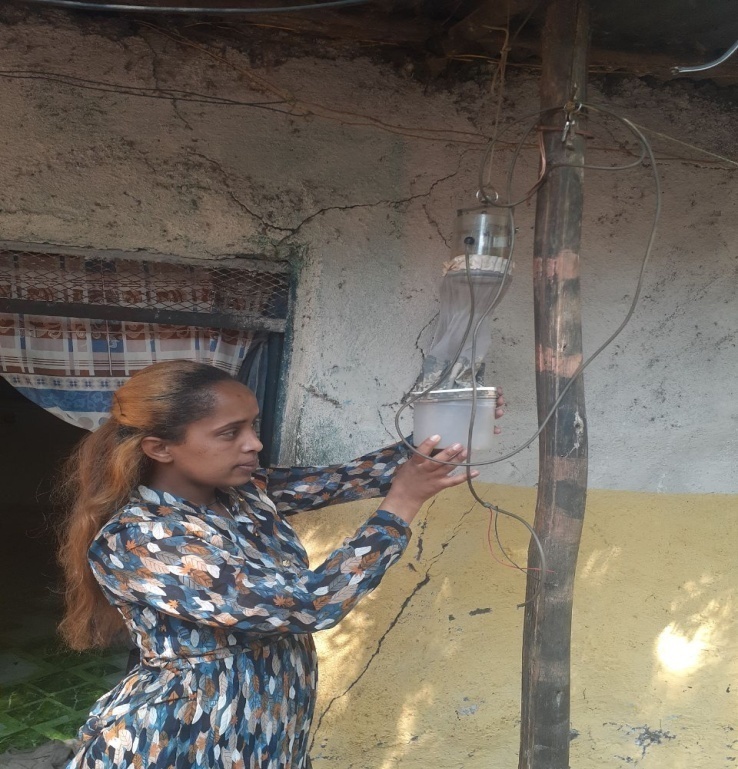

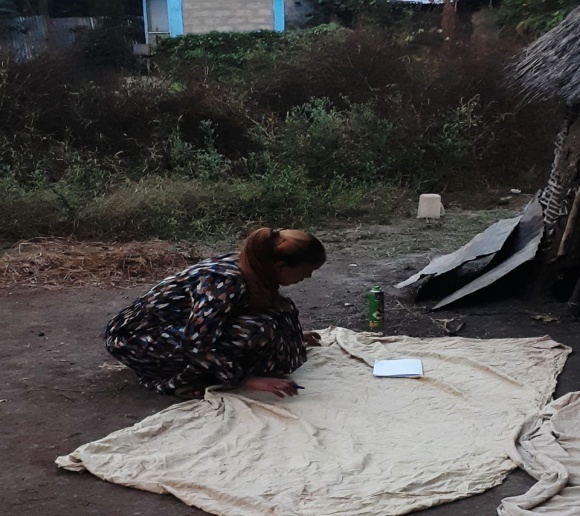


Figure showing mosquito collection from Itang, Ethiopia.

Supplement: Supplementary file 1 [file 61074cc8fd3ad25edff4b154.docx]
